# Supplementary material for: The Association of Glaucomatous Visual Field Loss and Balance
Source: PubMed Central journal article supplement — Transl Vis Sci Technol. 2017 May 22;6(3):8. doi: 10.1167/tvst.6.3.8 (PMC5444495; doi:10.1167/tvst.6.3.8), 2017-05-22
Supplement: tvst-06-03-07_s01.pdf [file tvst-06-03-07_s01.pdf]

Appendix: Conversion of 1 z-score unit to RMS sway and the logarithm of jerk\*

|                                    |                         | <b>RMS sway (m/s<sup>2</sup>)</b> | <b>Log [Jerk (m<sup>2</sup>/s<sup>5</sup>)]</b> |
|------------------------------------|-------------------------|-----------------------------------|-------------------------------------------------|
| <b>ICTSIB conditions</b>           | <b>Eyes open foam</b>   | 0.18                              | -0.01                                           |
|                                    | <b>Eyes open firm</b>   | 0.11                              | -1.51                                           |
|                                    | <b>Eyes closed foam</b> | 0.30                              | 0.92                                            |
|                                    | <b>Eyes closed firm</b> | 0.83                              | -1.05                                           |
| <b>Standing balance conditions</b> | <b>Feet together</b>    | 0.17                              | -0.33                                           |
|                                    | <b>Feet semi-tandem</b> | 0.30                              | 1.29                                            |
|                                    | <b>Feet tandem</b>      | 0.46                              | 2.65                                            |

\*log transformation of the raw jerk values was required to achieve a normal distribution
